# Supplementary material
Source: PubMed Central journal article supplement (PMC4537404)
Supplement: NIHMS712951-supplement-supplemental.pdf [file NIHMS712951-supplement-supplemental.pdf]

**A**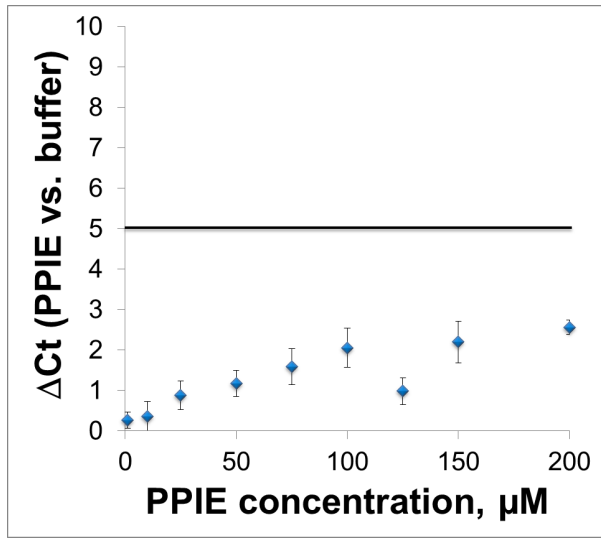**B**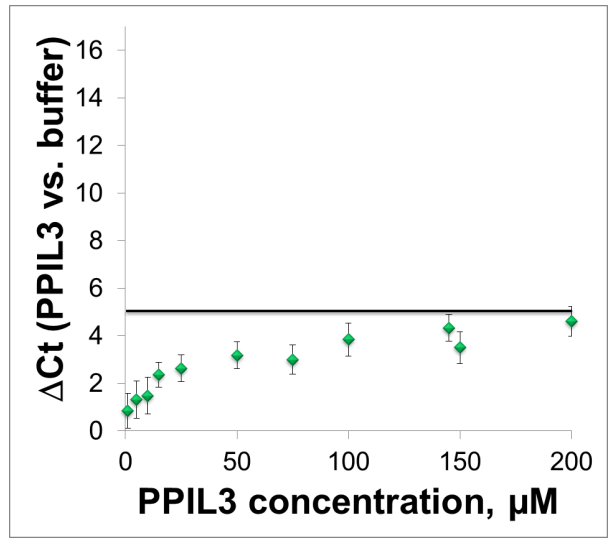**C**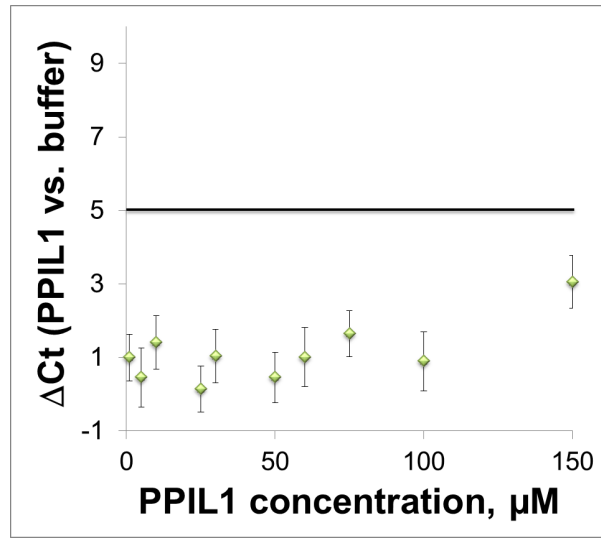

**A**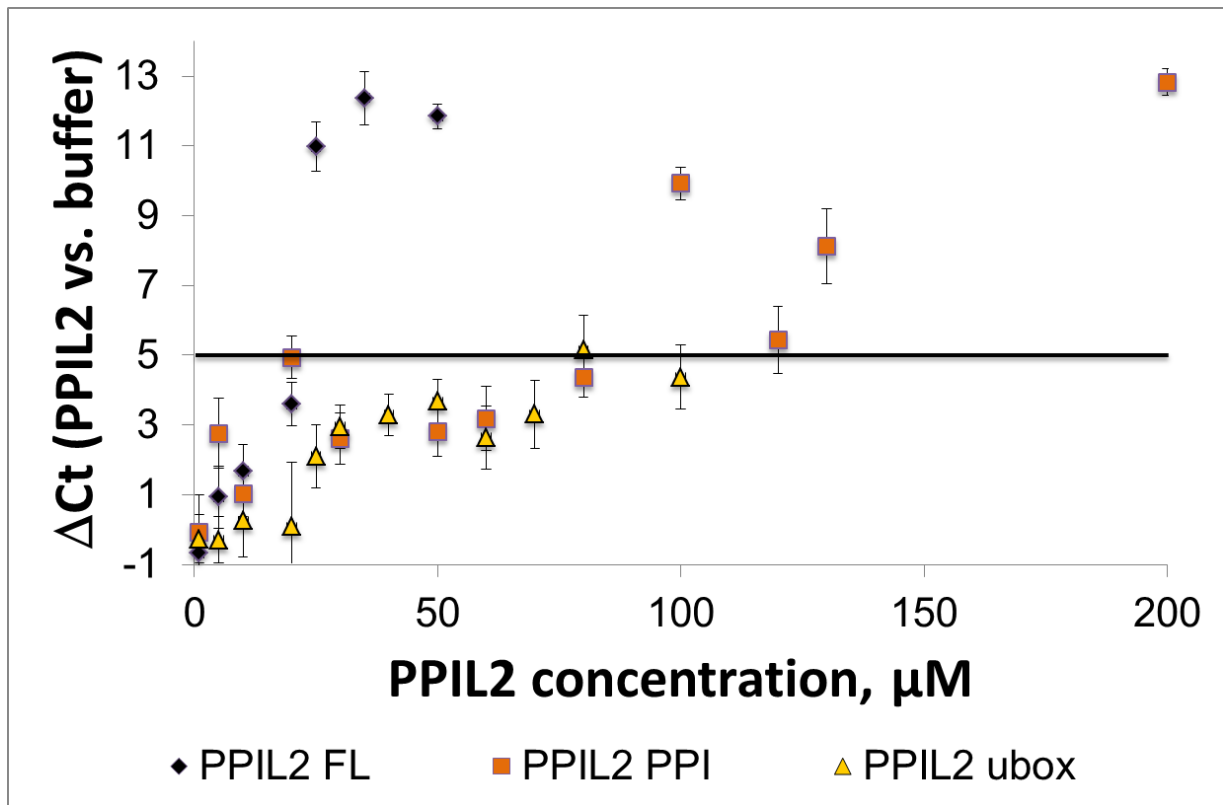**B**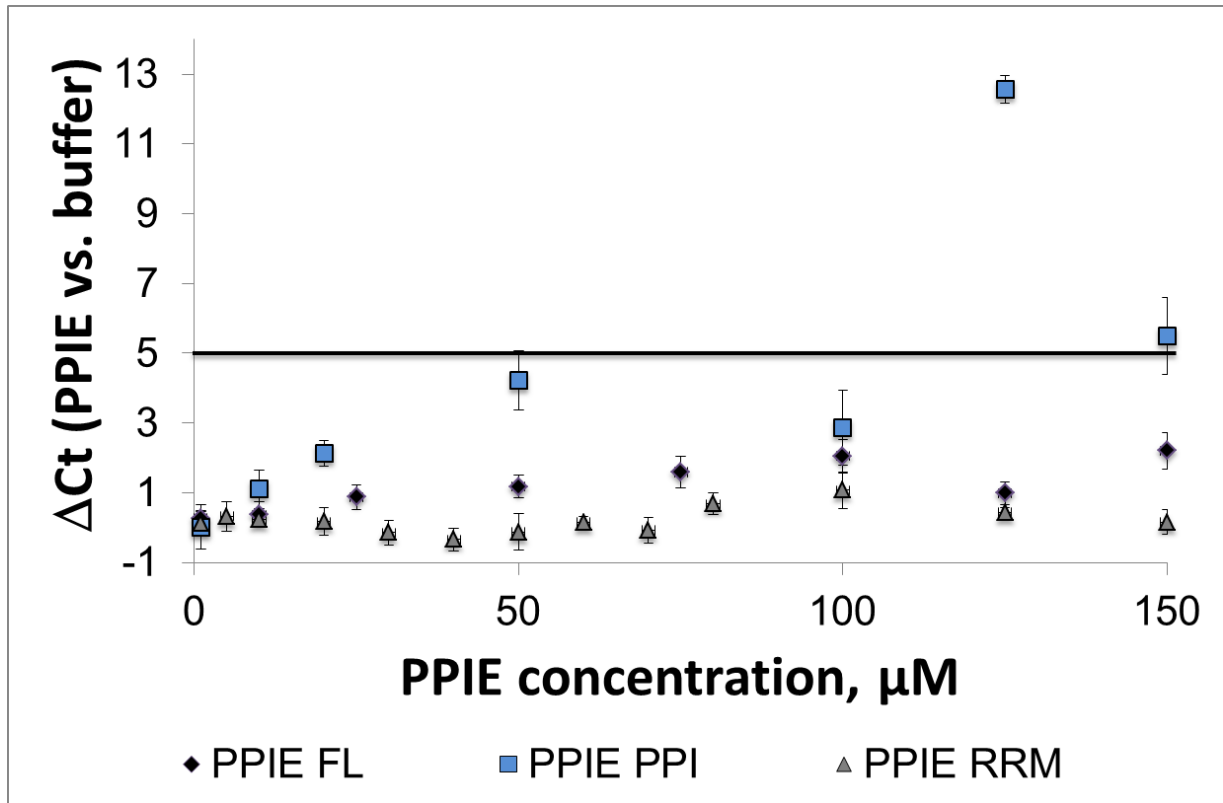

**Supplemental Figure 1.** *Non-inhibitory nuclear cyclophilins as measured by RT-qPCR.* Data is analyzed and presented as shown in Figure 2.

**Supplemental Figure 2.** *Effects of domain deletions on splicing efficiency.* Splicing efficiency determined from RT-qPCR analyses of at least two independent *in vitro* splicing reactions are plotted as in Figure 2. (A) Results for full length PPIL2, isolated PPI domain (PPI) and isolated U-box domain (U-box). Full-length PPIL2 is more strongly inhibitory than either isolated domain. (B) Results for full length PPIE, isolated PPI domain (PPI), and isolated RRM domain (RRM). The isolated PPI domain of PPIE is slightly more inhibitory than the full-length or RRM-only versions of PPIE.
